# Supplementary material
Source: PubMed Central journal article supplement (PMC6722017)
Supplement: NIHMS1032808-supplement-Supp_FigS1.pdf [file NIHMS1032808-supplement-Supp_FigS1.pdf]

|          |                                                                                         |     |
|----------|-----------------------------------------------------------------------------------------|-----|
| Majrity  | FSRPGLPVEYLQVPSXS MGRDI KVQFQSGGXNS PAVYLLDGLRAQDDYNGWDI NT PAFEWYIYQSGLSVXMPVGGQSSFYS  |     |
|          | 10 20 30 40 50 60 70 80                                                                 |     |
| Mkan 85B | FSRPGLPVEYHQVPSAAMGRSI KVQFQSGGDNS PAVYLLDGLRAQDDYNGWDI NT PAFEWYIYQSGLSVI MPVGGQSSFYS  | 80  |
| Mtb 85A  | FSRPGLPVEYLQVPSPS MGRDI KVQFQSGGANS PALYLLDGLRAQDDFS GWDI NT PAFEWYDQSGLSVVM PVGGQSSFYS | 80  |
| Mtb 85B  | FSRPGLPVEYLQVPSPS MGRDI KVQFQSGGNS PAVYLLDGLRAQDDYNGWDI NT PAFEWYIYQSGLSI VMPVGGQSSFYS  | 80  |
| Mtb 85C  | FSRPGLPVEYLQVPSAS MGRDI KVQFQGGG-- PHAVYLLDGLRAQDDYNGWDI NT PAFEEYIYQSGLSVI MPVGGQSSFYT | 78  |
| Majrity  | DWYXPACGKAGCQT YKWET FLTSEL PQWLXANRS VKPTGSAAVGLSMAGSSALI LAAYHPQQFIYAGLSLXLLDPSQGMG   |     |
|          | 90 100 110 120 130 140 150 160                                                          |     |
| Mkan 85B | DWYSPACGKAGCTTYKWET FLTSEL PQWLSANRSVKPTGSAAVGI SMAGSSALI LSVYHPQQFIYAGLSLALMDPSQGMG    | 160 |
| Mtb 85A  | DWYQPACGKAGCQT YKWET FLTSEL PGWLQANRHVKPTGSAAVGLSMAASSALT LAI YHPQQFVYAGAMSGLLDPSQAMG   | 160 |
| Mtb 85B  | DWYSPACGKAGCQT YKWET FLTSEL PQWLSANRAVKPTGSAAI GLSMAGSSAMI LAAYHPQQFIYAGLSALLDPSQGMG    | 160 |
| Mtb 85C  | DWYQPSQSNQGNITYKWET FLTREMPAWLQANKSVSPTGNAAVGLSMSGGSALI LAAYYPQQFPYAASLSGFLNPSQGMG      | 158 |
| Majrity  | PXLI GLAMGDAGGYKASDMWGPSS DPAWQRNDPXLQI PKLVANNTRLWVYCGNGTPSXLGGANI PAXFLEXFVRSSNLKF    |     |
|          | 170 180 190 200 210 220 230 240                                                         |     |
| Mkan 85B | PSLI GLAMGDAGGYKASDMWGPSS DPAWQRNDPSLHI PELVANNTRLWI YCGNGTPSXLGGANVPAEFLENFVRSSNLKF    | 240 |
| Mtb 85A  | PTLI GLAMGDAGGYKASDMWGPKE DPAWQRNDPLL NVGKLI ANNTRVWVYCGNGKPSDLGGNNLPAKFLEGFVRTSNI KF   | 240 |
| Mtb 85B  | PSLI GLAMGDAGGYKAADMWGPSS DPAWERNDPTQQI PKLVANNTRLWVYCGNGT PNLGGANI PAEFLENFVRSSNLKF    | 240 |
| Mtb 85C  | PTLI GLAMNDSGGYNANSMMWGPSS DPAWKRNDPMVQI PRLVANNTRI WVYCGNGT PSDLGGDNI PAKFLEGLTLRTNQT  | 238 |
| Majrity  | QDAYNAAGGHNVFN FPPNGT HSWEYWGAQLNAMKGDLSL-GATX---XX---X                                 |     |
|          | 250 260 270 280 290                                                                     |     |
| Mkan 85B | QDAYNAAGGHNAVFN LDANGT HSWEYWGAQLNAMKGDLSL-GAR                                          | 286 |
| Mtb 85A  | QDAYNAGGGHNGVFD FPDST HSWEYWGAQLNAMKPDLQRAL-GATPNTGPAPQGA                               | 295 |
| Mtb 85B  | QDAYNAAGGHNAVFN FPPNGT HSWEYWGAQLNAMKGDLSL-GAG                                          | 285 |
| Mtb 85C  | RDTYAADGGRNGVFN FPPNGT HSWPYWNEQLVAMKADI QHVLNGATPPAAPAAPAA                             | 294 |
|          | H149                                                                                    |     |

**Supplemental Figure 1. Alignment of amino acid sequences of the immunodominant epitopes of the fibronectin binding proteins of the antigen 85 complex of Mtb and *M. kansasii*.** The antigen 85 (Ag85) complex of three proteins with Ag85A, Ag85B and Ag85C of Mtb were compared by alignment with Ag85B of *M. kansasii* with ClustalW. Magenta and green boxed residues are pep8 (aa 61-69) and pep9 (aa 62-70) epitopes for polyfunctional CD4+ T cell-activation in rBCG85B/DNA85B-immunized H2d BALB/c or H2b/d CB6F1 mice. Blue boxed residues are H149 epitopes (aa 241-255) for CD4+ T cell-activation on the Ag85B in the immunized H2b C57BL/6 or H2b/d CB6F1 mice.

A

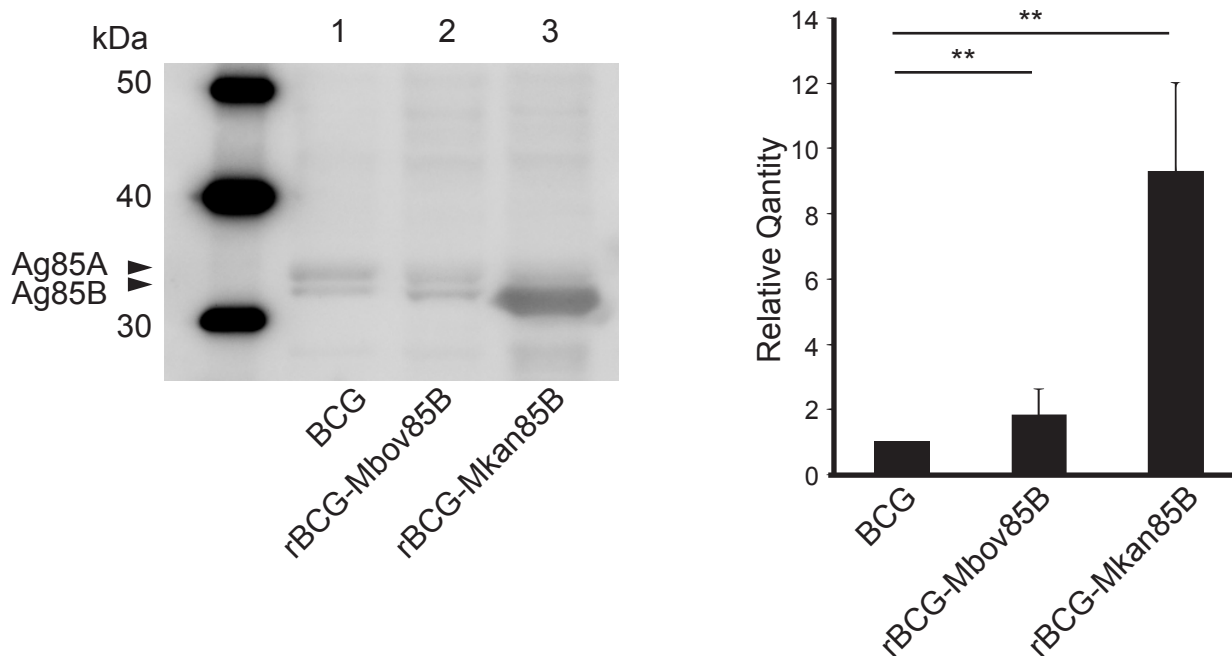

B

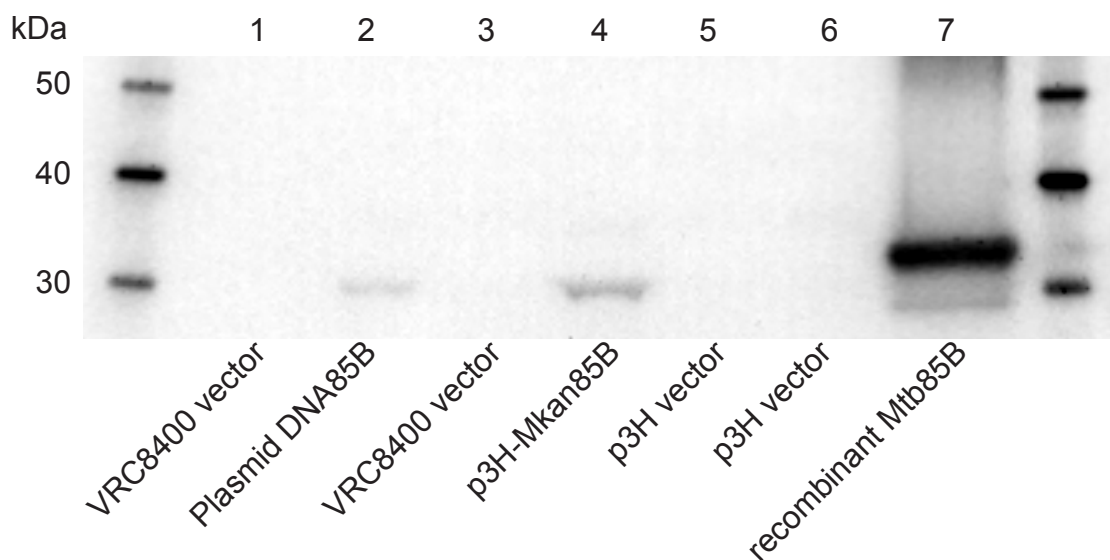

**Supplemental Figure 2. Western blot of expression of Mkan85B protein by rBCG and in 293T transfectants.**

(A) rBCG-Mkan85B, rBCG-Mbov85B, and BCG were grown in Middlebrook 7H9 medium supplemented 10% ADC, 0.0625% Tween80, and 100 mg/mL kanamycin. The bacterial cells were centrifuged then lysed, and SDS solubilized lysate was run on an SDS-containing polyacrylamide gel, and blotted. The expression of Ag85B was detected using anti-Ag85B polyclonal antibody (Abcam, Cambridge, UK). Lane 1, solubilized BCG lysate; Lane 2, solubilized rBCG-Mbov85B lysate; Lane 3, solubilized rBCG-Mkan85B lysate. Graph shows densitometric value of Ag85B. Western blot represents three independent experiments. \*\*,  $p < 0.01$ ; one-way ANOVA test. Error bars represent SEM. (B) Expression of Ag85B protein in p3H-Mkan85B and plasmid DNA85B transfected 293T cells. p3H-Mkan85B (lane 4), Plasmid DNA85B (lanes 2), or control p3H vector lacking Mkan85B (lane 5 and 6), control VRC8400 vector lacking Mkan85B (lane 1 and 2) were transfected into 293T cells as described in Materials and Methods and analyzed by SDS-PAGE, and Western Blotting, as described above. Lane 7, recombinant Mtb85B protein. Western blot represents three independent experiments.

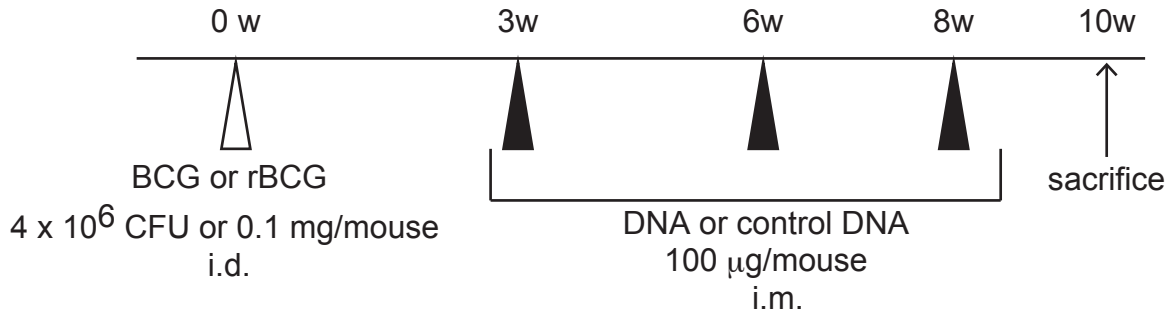

**Supplemental Figure 3. Immunization schedule.** Mice were immunized with BCG vaccine, rBCG-Mkan85B or rBCG-Mbov85B at a concentration of  $4 \times 10^6$  CFU or 0.1 mg of bacilli i.d., and 100 μg of plasmid DNA or control DNA in saline i.m. three times.

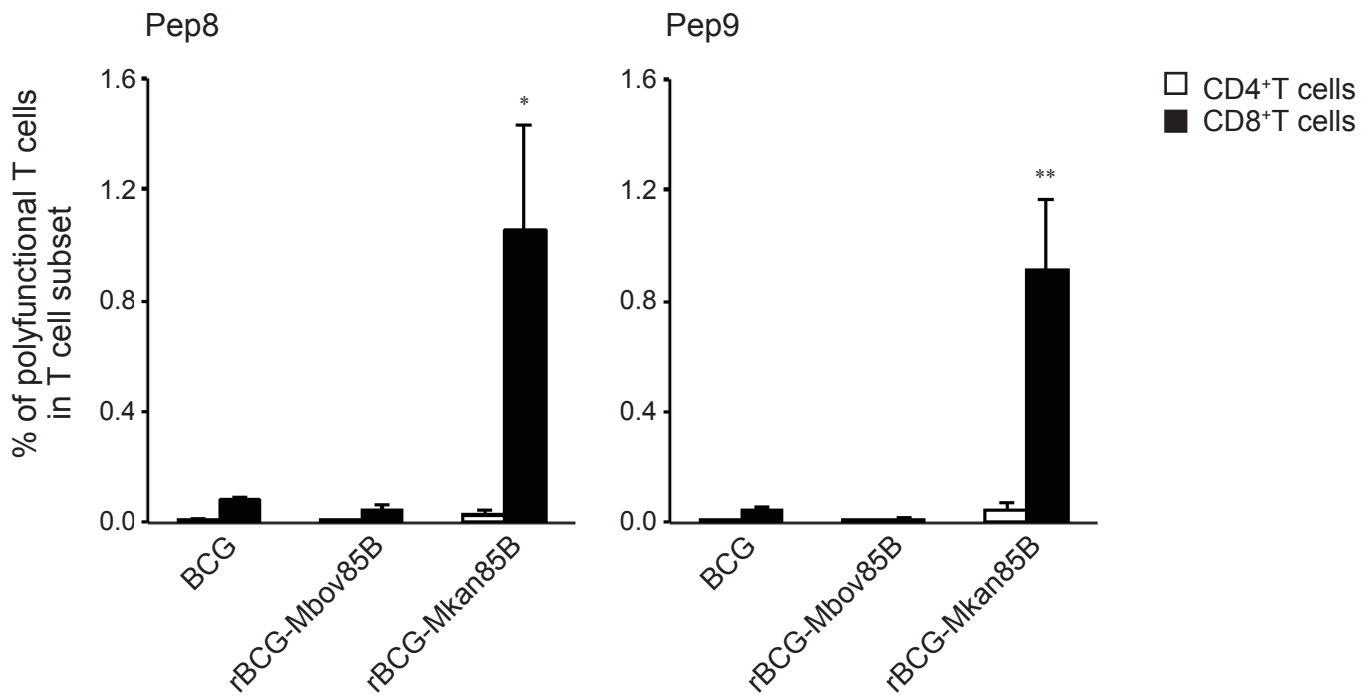

**Supplemental Figure 4. Comparison of immunogenicity between rBCG-Mkan85B and rBCG-Mbov85B.** CB6F1 mice were immunized by priming with rBCG-Mkan85B and boosting with plasmid DNA-Mkan85B (rBCG-Mkan85B/DNA-Mkan85B) or rBCG-Mbov85B and boosting with plasmid DNA-Mbov85B (rBCG-Mbov85B/DNA-Mbov85B). We studied polyfunctional CD4<sup>+</sup> or CD8<sup>+</sup> T cells after immunization followed by in vitro restimulation with pep8 (left panel) or pep9 (right panel). Data represent mean +SEM (n = 3 to 7). \* p < 0.05, \*\* p < 0.01; one-way ANOVA using Turkey-Kramer test.
